# Multiversal SpaceTime (MSpaceTime) Not Neural Network as Source of Intelligence in Generalized Quantum Mechanics, Extended General Relativity, Darwin Dynamics for Artificial Super Intelligence Synthesis

Yang Zhang

Multiverse Corp

[hwswworld@yandex.com](mailto:hwswworld@yandex.com)

This article has been withdrawn by bioRxiv owing to a screening error.
